# Supplementary material for: Blood levels of serotonin are specifically correlated with plasma lysophosphatidylserine among the glycero-lysophospholipids
Source: PubMed Central journal article supplement — BBA Clin. 2015 Aug 20;4:92–8. doi: 10.1016/j.bbacli.2015.08.003 (PMC4661731; doi:10.1016/j.bbacli.2015.08.003), 2015-08-20
Supplement: mmc1.pdf [file mmc1.pdf]

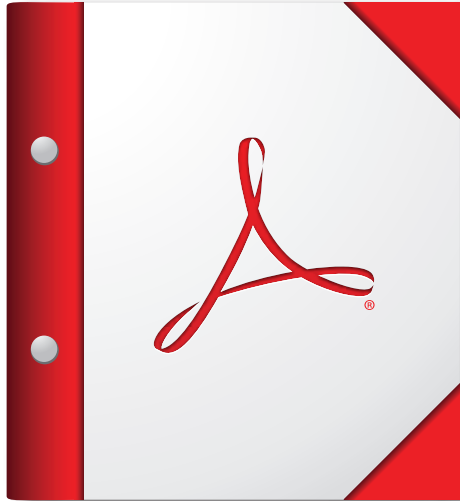

**For the best experience, open this PDF portfolio in  
Acrobat 9 or Adobe Reader 9, or later.**

[Get Adobe Reader Now!](#)
